# Supplementary material for: KSHV-encoded vCyclin can modulate HIF1α levels to promote DNA replication in hypoxia
Source: eLife. 2021 Jul 19;10:e57436. doi: 10.7554/eLife.57436 (PMC8315796; doi:10.7554/eLife.57436)
Supplement: Figure 1—figure supplement 1—source data 1. [file elife-57436-fig1-figsupp1-data1.xlsx]

## Sheet: Sheet1
Fold change of PDK1 in BJAB and BJAB-KSHV cells
	Fold Change	Fold Change	Fold Change
	Experiment 1	Experiment 2	Experiment 3	Mean	SEM	N	p-value
BJAB	1	1	1	1	0	3
BJAB-KSHV	1.39	1.25	1.79	1.47	0.16	3	0.0421
Fold Change of LDHA P4HA1 and PDK1 in HEK293T/HEK293T-BAC16-KSHV Normoxia/Hypoxia
HEK293T
	Fold Change	Fold Change	Fold Change
	Experiment 1	Experiment 2	Experiment 3	Mean	SEM	N	p-value
LDHA	1	1	1	1	0	3	NA
P4HA1	1	1	1	1	0	3	NA
PDK1	1	1	1	1	0	3	NA
HEK293T-1% O2
	Fold Change	Fold Change	Fold Change
	Experiment 1	Experiment 2	Experiment 3	Mean	SEM	N	p-value
LDHA	1.1	0.8	0.76	0.886667	0.107	3	0.35
P4HA1	4.44	5.06	4.18	4.56	0.26	3	0.0002
PDK1	3.36	3.41	2.99	3.25333	0.13	3	0.0001
HEK293T-KSHV
	Fold Change	Fold Change	Fold Change
	Experiment 1	Experiment 2	Experiment 3	Mean	SEM	N	p-value
LDHA	1.37	1.12	1.17	1.22	0.07	3	0.04
P4HA1	1.78	1.65	1.46	1.63	0.09	3	0.0025
PDK1	2.28	1.98	1.8	2.02	0.14	3	0.0019
HEK293T-KSHV-1% O2
	Fold Change	Fold Change	Fold Change
	Experiment 1	Experiment 2	Experiment 3	Mean	SEM	N	p-value
LDHA	0.82	0.68	0.55	0.683333	0.07	3	0.0153
P4HA1	2.45	2.68	4.7	3.27667	0.71	3	0.03
PDK1	2.67	3.6	3.3	3.19	0.27	3	0.0013
Fold change of PDK1 in control and infected PBMC grown in normoxic or hypoxic conditions
	Fold Change	Fold Change	Fold Change
	Experiment 1	Experiment 2	Experiment 3	Mean	SEM	N	p-value
PBMC	1	1	1	1	0	3
PBMC-1%O2	1.78	1.71	1.45	1.64667	0.18	3	0.0001
PBMC-KSHV	1.82	1.4	1.51	1.57667	0.35	3	0.0002
PBMC-KSHV-1%O2	2.19	1.67	1.98	1.94667	0.33	3	0.0001
Fold Change expression of PDK1 in BJAB cells grown under normoxic or hypoxic conditions for various time periods
	Fold Change	Fold Change	Fold Change
	Experiment 1	Experiment 2	Experiment 3	Mean	SEM	N	p-value
Normoxic	1	1	1	1	0	3	NA
12 Hour Hypoxia	1.08	1.29	1.15	1.17	0.06	3	0.04
24Hour Hypoxia	1.48	1.62	1.76	1.62	0.08	3	0.0015
36 Hour Hypoxia	1.82	1.94	2.06	1.94	0.06	3	0.0002
48 Hour Hypoxia	2.38	2.28	2.21	2.29	0.04	3	0.0001
60 Hour Hypoxia	3.62	3.49	3.92	3.67	0.13	3	0.0001
Fold Change expression of PDK1 in BJAB-KSHV cells grown under normoxic or hypoxic conditions for various time periods
	Fold Change	Fold Change	Fold Change
	Experiment 1	Experiment 2	Experiment 3	Mean	SEM	N	p-value
Normoxic	1	1	1	1	0	3	NA
12 Hour Hypoxia	1.27	1.22	1.1	1.19	0.05	3	0.01
24Hour Hypoxia	1.91	2.09	1.78	1.92	0.08	3	0.005
36 Hour Hypoxia	0.35	0.6	0.55	0.57	0.07	3	0.002
48 Hour Hypoxia	0.7	0.64	0.65	0.66	0.01	3	0.0001
60 Hour Hypoxia	1.24	1.39	1.26	1.29	0.04	3	0.003
