# Supplementary material for: KSHV-encoded vCyclin can modulate HIF1α levels to promote DNA replication in hypoxia
Source: eLife. 2021 Jul 19;10:e57436. doi: 10.7554/eLife.57436 (PMC8315796; doi:10.7554/eLife.57436)
Supplement: Figure 1—source data 1. [file elife-57436-fig1-data1.xlsx]

## Sheet: Experiment 1D
Fold Change of LDHA P4HA1 and PDK1 in BJAB/BJAB-KSHV Normoxia/Hypoxia
BJAB
	Fold Change	Fold Change	Fold Change
	Experiment 1	Experiment 2	Experiment 3	Mean	SEM	N	p-value
LDHA	1	1	1	1	0	3	NA
P4HA1	1	1	1	1	0	3	NA
PDK1	1	1	1	1	0	3	NA
BJAB-1% O2
	Fold Change	Fold Change	Fold Change
	Experiment 1	Experiment 2	Experiment 3	Mean	SEM	N	p-value
LDHA	2.51	2.67	2.26	2.48	0.11	3	0.0002
P4HA1	7.76	6.93	6.53	7.07333	0.36	3	0.0001
PDK1	3.006	2.91	2.63	2.84867	0.11	3	0.0001
BJAB-KSHV
	Fold Change	Fold Change	Fold Change
	Experiment 1	Experiment 2	Experiment 3	Mean	SEM	N	p-value
LDHA	2.35	2.66	2.24	2.41667	0.12	3	0.0003
P4HA1	4.61	3.88	3.24	3.91	0.4	3	0.0018
PDK1	1.5	1.49	1.79	1.59333	0.09	3	0.0003
BJAB-KSHV-1% O2
	Fold Change	Fold Change	Fold Change
	Experiment 1	Experiment 2	Experiment 3	Mean	SEM	N	p-value
LDHA	2.34	2.2	1.86	2.13333	0.14	3	0.0014
P4HA1	11.9	9.45	7.71	9.68667	1.21	3	0.002
PDK1	2.49	2.4	2.12	2.33667	0.11	3	0.0003
