# Supplementary material for: KSHV-encoded vCyclin can modulate HIF1α levels to promote DNA replication in hypoxia
Source: eLife. 2021 Jul 19;10:e57436. doi: 10.7554/eLife.57436 (PMC8315796; doi:10.7554/eLife.57436)
Supplement: Figure 2—figure supplement 1—source data 1. [file elife-57436-fig2-figsupp1-data1.xlsx]

## Sheet: Sheet1
Fold Change of LDH, P4HA1 and PDK1 in Mock, vGPCR, LANA, RTA, vCyclin and vFLIP transfection
LDH
	Fold Change	Fold Change	Fold Change
	Experiment 1	Experiment 2	Experiment 3	Mean	SEM	p-value
Mock	1	1	1	1	0
vGPCR	1.001	2.25	1.05	1.43	0.4	0.34
LANA	0.84	1.01	1.12	0.99	0.08	0.908
RTA	0.56	1.41	0.6	0.85	0.27	0.63
vCyclin	0.49	0.36	0.46	0.43	0.03	0.0001
vFLIP	0.65	0.97	0.91	0.84	0.09	0.18
P4HA1
	Fold Change	Fold Change	Fold Change
	Experiment 1	Experiment 2	Experiment 3	Mean	SEM	p-value
Mock	1	1	1	1	0
vGPCR	1.76	1.84	2.01	1.87	0.07	0.0003
LANA	2.58	0.89	2.81	2.09	0.6	0.14
RTA	1.56	1.7	1.57	1.6	0.04	0.0002
vCyclin	0.86	0.81	0.84	0.83	0.01	0.0004
vFLIP	1.54	1.09	1.13	1.25	0.14	0.15
PDK1
	Fold Change	Fold Change	Fold Change
	Experiment 1	Experiment 2	Experiment 3	Mean	SEM	p-value
Mock	1	1	1	1	0
vGPCR	1.64	2.27	1.79	1.9	0.19	0.009
LANA	1.2	1.65	1.41	1.42	0.13	0.03
RTA	1.45	1.35	0.76	1.18	0.21	0.43
vCyclin	0.44	0.53	0.51	0.49	0.03	0.0001
vFLIP	1.33	1.59	0.79	1.23	0.23	0.37
