# Supplementary material for: KSHV-encoded vCyclin can modulate HIF1α levels to promote DNA replication in hypoxia
Source: eLife. 2021 Jul 19;10:e57436. doi: 10.7554/eLife.57436 (PMC8315796; doi:10.7554/eLife.57436)
Supplement: Figure 2—source data 1. [file elife-57436-fig2-data1.xlsx]

## Sheet: Sheet1
Fold change of LDH, P4HA1 and PDK1 in hypoxic Mock, LANA, RTA,vFLIP,vGPCR and vCyclin expressing cell compared to Normoxic Mock transfection
LDH
	Fold Change	Fold Change	Fold Change
	Experiment 1	Experiment 2	Experiment 3	Mean	SEM	p-value
Mock	1	1	1	1	0
Mock-1%O2	1.99	2.01	2.32	2.10667	0.1	0.0005
LANA-1%O2	2.23	2.37	1.94	2.18	0.12	0.0007
RTA-1%O2	3.11	2.98	2.9	2.99667	0.06	0.0001
vFLIP-1%O2	2.13	2.25	2.21	2.19667	0.03	0.0001
vGPCR-1%O2	2.7	2.84	2.89	2.81	0.05	0.0001
vCyclin-1%O2	1.02	1.005	0.87	0.965	0.047	0.503
P4HA1
	Fold Change	Fold Change	Fold Change
	Experiment 1	Experiment 2	Experiment 3	Mean	SEM	p-value
Mock	1	1	1	1	0
Mock-1%O2	7.63	7.54	8.23	7.8	0.21	0.0001
LANA-1%O2	7.4	10.4	7.99	8.59667	0.91	0.0012
RTA-1%O2	9.006	9.46	10.72	9.72867	0.51	1e-05
vFLIP-1%O2	6.23	6.68	6.06	6.32333	0.18	0.0001
vGPCR-1%O2	7.35	7.15	8.56	7.68667	0.44	0.0001
vCyclin-1%O2	2.67	2.84	2.27	2.59333	16	0.0007
PDK1
	Fold Change	Fold Change	Fold Change
	Experiment 1	Experiment 2	Experiment 3	Mean	SEM	p-value
Mock	1	1	1	1	0
Mock-1%O2	5.41	4.99	5.6	5.33333	0.18	0.0001
LANA-1%O2	5.32	6.16	4.97	5.48333	0.35	0.0002
RTA-1%O2	6.37	5.7	6.84	6.30333	0.33	0.0001
vFLIP-1%O2	4.83	5.22	4.78	4.94333	0.13	0.0001
vGPCR-1%O2	5.6	6.68	6.23	6.17	0.31	0.0001
vCyclin-1%O2	2.13	2.41	2.24	2.26	0.08	0.0001
