# Supplementary material for: KSHV-encoded vCyclin can modulate HIF1α levels to promote DNA replication in hypoxia
Source: eLife. 2021 Jul 19;10:e57436. doi: 10.7554/eLife.57436 (PMC8315796; doi:10.7554/eLife.57436)
Supplement: Figure 4—figure supplement 2—source data 1. [file elife-57436-fig4-figsupp2-data1.xlsx]

## Sheet: Sheet1
Fold Change of vCyclin in BCBL1 and JSC1 cell lines
JSC1
	Fold Change	Fold Change	Fold Change
	Experiment 1	Experiment 2	Experiment 3	Mean	SEM	p-value
JSC1-Normoxia	1	1	1	1	0
JSC1-Hypoxia	1.751	1.927	1.725	1.801	0.06	0.0002
BCBL1
	Fold Change	Fold Change	Fold Change
	Experiment 1	Experiment 2	Experiment 3	Mean	SEM	p-value
BCBL1-Normoxia	1	1	1	1	0
BCBL1-Hypoxia	1.363	1.435	1.141	1.313	0.08	0.02
Luciferase Assay
Experiment 1
	Read 1	Read 2	Read 3	Average	Relative to Ltd
Delta HRE1	213100	209150	203688	208646	0.213886
Delta HRE2	407375	403223	390102	400233	0.410285
Ltd	977378	983700	965422	975500	1
Delta HRE3	430109	422429	409094	420544	0.431106
Delta HRE4	369771	345235	333479	349495	0.358273
Experiment 2
	Read 1	Read 2	Read 3	Average	Relative to Ltd
Delta HRE1	118505	124421	130405	124444	0.250555
Delta HRE2	220255	231430	241754	231146	0.465389
Ltd	458665	498008	533346	496673	1
Delta HRE3	218977	236824	241563	232455	0.468024
Delta HRE4	191104	200355	209974	200478	0.403641
Experiment 3
	Read 1	Read 2	Read 3	Average	Relative to Ltd
Delta HRE1	89315	97369	95605	94096.3	0.257731
Delta HRE2	177277	177782	178614	177891	0.487246
Ltd	346260	369452	379575	365096	1
Delta HRE3	173562	182553	176223	177446	0.486027
Delta HRE4	138994	174159	133921	149025	0.408181
Experiment 4
	Read 1	Read 2	Read 3	Average	Relative to Ltd
Delta HRE1	112178	111078	110571	111276	0.359138
Delta HRE2	170719	173544	167502	170588	0.550567
Ltd	305020	312913	311591	309841	1
Delta HRE3	138327	143463	143669	141820	0.457718
Delta HRE4	102113	103761	109486	105120	0.339271
Experiment 5
	Read 1	Read 2	Read 3	Average	Relative to Ltd
Delta HRE1	149161	146192	148671	148008	0.334907
Delta HRE2	228946	225075	232322	228781	0.517678
Ltd	441637	446203	437972	441937	1
Delta HRE3	179247	182353	185141	182247	0.412382
Delta HRE4	132952	131737	135017	133235	0.30148
Combined analysis
	Experiment 1	Experiment 2	Experiment 3	Experiment 4	Experiment 5	Mean	SEM	SD	p-value
Delta HRE1	0.213886	0.250555	0.257731	0.359138	0.334907	0.283243	0.027	0.061	0.0001
Delta HRE2	0.410285	0.465389	0.487246	0.550567	0.517677	0.486233	0.023	0.053	0.0001
Ltd	1	1	1	1	1	1	NA	NA	NA
Delta HRE3	0.431106	0.468024	0.486027	0.457717	0.412382	0.451051	0.013	0.029	0.0001
Delta HRE4	0.358273	0.403641	0.408181	0.33927	0.30148	0.362169	0.02	0.044	0.0001
