# Supplementary material for: KSHV-encoded vCyclin can modulate HIF1α levels to promote DNA replication in hypoxia
Source: eLife. 2021 Jul 19;10:e57436. doi: 10.7554/eLife.57436 (PMC8315796; doi:10.7554/eLife.57436)
Supplement: Figure 6—source data 1. [file elife-57436-fig6-data1.xlsx]

## Sheet: Sheet1
vCyclin Fold Change
	Fold Change	Fold Change	Fold Change	Fold Change	Fold Change	Fold Change	Fold Change	Fold Change	Fold Change
	Experiment 1	Experiment 2	Experiment 3	Experiment 4	Experiment 5	Experiment 6	Experiment 7	Experiment 8	Experiment 9
ShControl	1	1	1	1	1	1	1	1	1
ShvCyclinn	0.27	0.25	0.24	0.25	0.28	0.27	0.28	0.32	0.25
Relative KSHV Copy No.
Experiment 1
		Quantity	Quantity Mean	Quantity SD			Quantity	Quantity Mean	Quantity SD			Quantity	Quantity Mean	Quantity SD			Quantity	Quantity Mean	Quantity SD
		3.8772e+06					3.30197e+06					1.16672e+06					1.03239e+06
	ShCon-Nor	3.47885e+06	3689764	200208		ShCon-Hyp	3.14747e+06	3104581	221960		ShvCyclin-Nor	1.12726e+06	1.10753e+06	71137.2		ShvCyclin-Hyp	1.1124e+06	1.00447e+06	124265
		3.71324e+06					2.86431e+06					1.02861e+06					868623
Experiment 2
		Quantity	Quantity Mean	Quantity SD			Quantity	Quantity Mean	Quantity SD			Quantity	Quantity Mean	Quantity SD			Quantity	Quantity Mean	Quantity SD
		4.85464e+06					3.23356e+06					1.52958e+06					1.04767e+06
	ShCon-Nor-Repeat 2	3338041	3917810	818927		ShCon-Hyp-Repeat 2	3.29175e+06	3.15329e+06	191650		ShvCyclin-Nor Repeat 2	1.33647e+06	1.29699e+06	254625		ShvCyclin-Hyp Repeat 2	1.03983e+06	1.03223e+06	20328.8
		3.56075e+06					2.93455e+06					1.02494e+06					1.0092e+06
Experiment 3
		Quantity	Quantity Mean	Quantity SD			Quantity	Quantity Mean	Quantity SD			Quantity	Quantity Mean	Quantity SD			Quantity	Quantity Mean	Quantity SD
		11018044					3.15138e+06					1.19777e+06					54464.9
	ShCon-Nor-Repeat 3	3.23811e+06	5854914	4.47154e+06		ShCon-Hyp-Repeat 3	3.28808e+06	3235942	73894.2		ShvCyclin-Nor Repeat 3	1.3689e+06	1.25305e+06	100357		ShvCyclin-Hyp Repeat 3	52050.2	49530.5	6567.34
		3.30859e+06					3.26837e+06					1.19249e+06					42076.5
Relative value
		Experiment 1	Experiment 2	Experiment 3	Mean	SEM	p-value
	ShCon- Nor	1	1	1	1	0	NA
	ShCon- Hyp	0.84	0.8	0.55	0.73	0.09	0.0409
	ShvCyclin- Nor	0.28	0.35	0.21	0.28	0.04	0.0001
	ShvCyclin- Hyp	0.17	0.26	0.001	0.14	0.07	0.0004
